# Supplementary material for: Diagnostic and Prognostic Value of Three microRNAs in Environmental Asbestiform Fibers-Associated Malignant Mesothelioma
Source: MDPI journal article supplement (doi:10.3390/jpm11111205), 2021-11-15
Supplement: s1 [file s1]

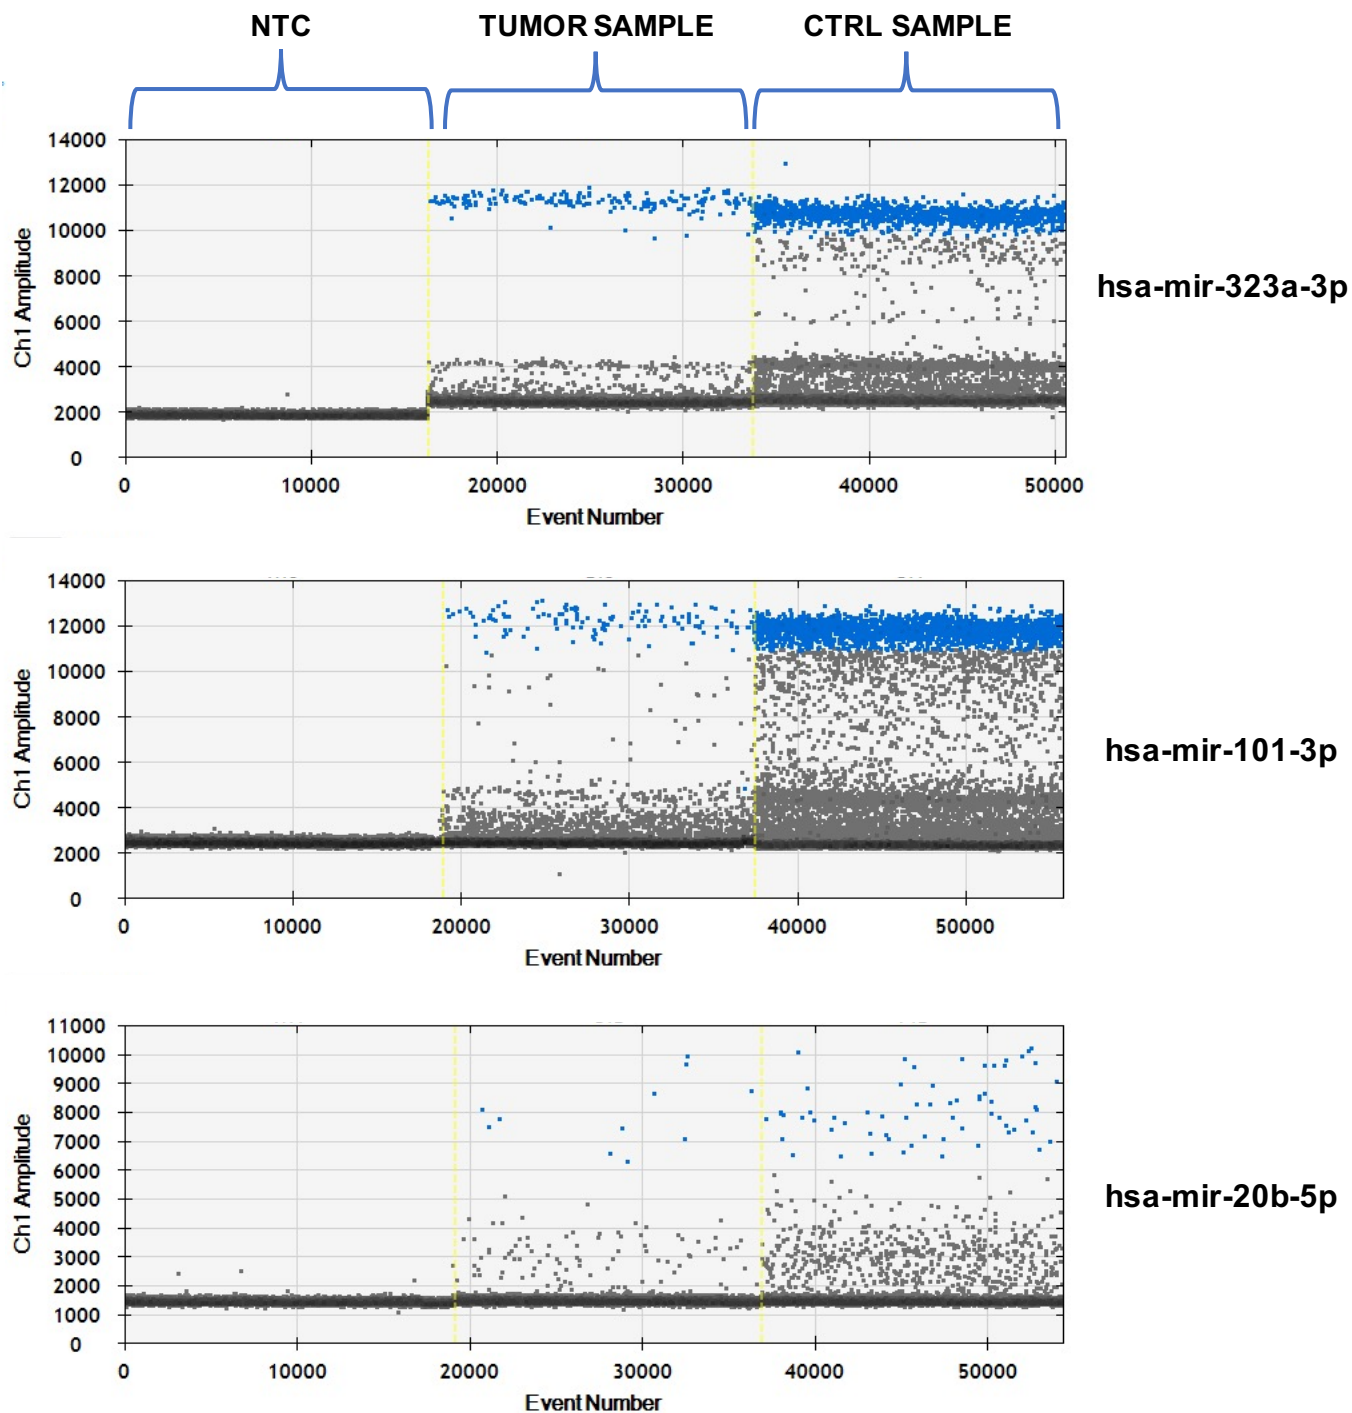

Figure S1: ddPCR amplification signals obtained for NTC sample, MM sample and control sample for the three investigated miRNAs.
